1  
2  
3  
4  
5  
6  
7  
8  
9  
10  
11  
12  
13  
14  
15  
16  
17  
18  
19  
20

## **A screen for modulation of nucleocapsid protein condensation identifies small molecules with anti-coronavirus activity**

Rui Tong Quek<sup>1,2</sup>, Kierra S. Hardy<sup>1,2</sup>, Stephen G. Walker<sup>3</sup>, Dan T. Nguyen<sup>1,2</sup>, Taciani de Almeida Magalhães<sup>4</sup>, Adrian Salic<sup>4</sup>, Sujatha M. Gopalakrishnan<sup>3</sup>, Pamela A. Silver<sup>1,2\*</sup>, Timothy J. Mitchison<sup>1\*</sup> (\*co-corresponding)

<sup>1</sup>Department of Systems Biology, Harvard Medical School, Boston, Massachusetts, USA  
<sup>2</sup>Wyss Institute for Biologically Inspired Engineering, Harvard University, Boston, Massachusetts, USA  
<sup>3</sup>Drug Discovery Science and Technology, AbbVie Inc., North Chicago, Illinois, USA  
<sup>4</sup>Department of Cell Biology, Harvard Medical School, Boston, Massachusetts, USA  
\*Correspondence: [timothy\\_mitchison@hms.harvard.edu](mailto:timothy_mitchison@hms.harvard.edu) (T.J.M.), [pamela\\_silver@hms.harvard.edu](mailto:pamela_silver@hms.harvard.edu) (P.A.S.)

## 21 **Abstract**

22 Biomolecular condensates formed by liquid-liquid phase separation have been implicated in multiple  
23 diseases. Modulation of condensate dynamics by small molecules has therapeutic potential, but so far,  
24 few condensate modulators have been disclosed. The SARS-CoV-2 nucleocapsid (N) protein forms phase  
25 separated condensates that are hypothesized to play critical roles in viral replication, transcription and  
26 packaging, suggesting that N condensation modulators might have anti-coronavirus activity across  
27 multiple strains and species. Here, we show that N proteins from all seven human coronaviruses (HCoVs)  
28 vary in their tendency to undergo phase separation when expressed in human lung epithelial cells. We  
29 developed a cell-based high-content screening platform and identified small molecules that both promote  
30 and inhibit condensation of SARS-CoV-2 N. Interestingly, these host-targeted small molecules exhibited  
31 condensate-modulatory effects across all HCoV Ns. Some have also been reported to exhibit antiviral  
32 activity against SARS-CoV-2, HCoV-OC43 and HCoV-229E viral infections in cell culture. Our work  
33 reveals that the assembly dynamics of N condensates can be regulated by small molecules with  
34 therapeutic potential. Our approach allows for screening based on viral genome sequences alone and  
35 might enable rapid paths to drug discovery with value for confronting future pandemics.

## 36 **Introduction**

37 Biomolecular condensates are membraneless organelles formed by liquid-liquid phase separation of  
38 specific RNAs and/or proteins, resulting in their local concentration in a liquid-like compartment distinct  
39 in constituents from the surrounding cytoplasm or nucleoplasm (1-3). Such biomolecular condensates  
40 have been implicated in the formation of signaling complexes, processing bodies, stress granules and  
41 germline bodies (1), where they facilitate the segregation and concentration of factors involved in various  
42 cellular processes. The material properties of condensates are tailored to their functions; dynamic  
43 condensates with mobile constituents enhance biochemical reactions that involve molecular turnover,  
44 whereas more glass-like or solid condensates promote stiffness for structural support (4).

45 Phase separation and the formation of liquid condensates known as viroplasm or inclusion bodies have  
46 been observed in large groups of viruses such as the *Mononegavirales* order of non-segmented negative-  
47 strand RNA viruses (5-16) and the *Reoviridae* family of double-stranded RNA viruses (17-19). The  
48 formation of viroplasm is induced by viral proteins and RNAs expressed during infection and they serve  
49 as organizational hubs for concentration of viral or host factors involved in viral entry, replication, virion  
50 assembly and/or packaging (20). The SARS-CoV-2 nucleocapsid (N) protein drives virion packaging  
51 through RNA-binding and enhances viral transcription and replication at replication and transcription  
52 complexes (RTCs) (21,22). Recent observations that the SARS-CoV-2 N protein forms liquid condensates

53 (21,23-29) has raised the possibility that these N condensates may also behave as dynamic viroplasms.  
54 However, whether condensate assembly is a conserved property of HCoV Ns has not been examined.

55 Macromolecular phase separation is often driven by unstructured regions of proteins, which makes  
56 condensates unconventional for targeting by small molecule drugs. Nevertheless, recent studies  
57 successfully identified small molecules that modulate phase transitions of proteins involved in ALS (30,31)  
58 and respiratory syncytial virus infection (32). These studies, as well the recent founding of condensate-  
59 focused biotechnology companies, has led to an explosion of interest in targeting condensates for drug  
60 discovery, but to date, few active molecules have been disclosed (33-35). In principle, small molecules  
61 could achieve therapeutic activity by inhibiting the assembly of cytotoxic condensates (30,31), or by  
62 promoting condensation, leading to hardening and cessation of essential dynamics (32). Given the  
63 ongoing need for antivirals to confront the COVID-19 pandemic, and the likelihood that similar pandemics  
64 will emerge in the future, we focused on identifying small molecules that perturb SARS-CoV-2 N  
65 condensation, with the hope that some might exhibit broad-spectrum anti-viral activity. We developed a  
66 cell-based high-content screening platform to identify small molecules that either promote or inhibit N  
67 condensation and identified small molecules with condensate-modulating activity. Our results suggest it  
68 may be possible to discover drug-like small molecules that promote and inhibit condensation of many  
69 proteins and RNAs, which will open new paths to drug discovery.

## 70 **Results**

### 71 **HCoV N condensates are polyIC-inducible and exhibit varied material properties**

72 To investigate the condensation behavior of HCoV N proteins, we stably expressed each of the seven  
73 HCoV N proteins fused to a C-terminal EGFP in A549 cells (human lung cancer derived) (Figure 1A).  
74 Western blots confirmed that the expression levels of each of the seven N proteins were similar among  
75 the stably expressing A549 cells (Supplementary Figure 1A). Under control conditions, SARS-CoV, SARS-  
76 CoV-2, HCoV-OC43 and MERS-CoV N showed diffuse cytoplasmic localization, while HCoV-229E,  
77 HCoV-NL63 and HCoV-HKU1 N formed spherical condensates (henceforth referred to as ‘constitutive’  
78 condensates) of varying numbers (Figures 1A-B). Thus, the tendency to phase separate and condense  
79 varies between N species under these conditions.

80 Upon transfection of low molecular weight polyinosinic-polycytidylic acid (polyIC), a synthetic analog of  
81 dsRNA that mimics viral genome replication intermediates and triggers innate immune pathways, N  
82 condensates formed across all seven HCoV N cell lines (Figures 1A-B). For the species that exhibited  
83 constitutive condensation, the number of condensates increased upon polyIC transfection (Figures 1A-  
84 B). Addition of polyIC to an A549 cell line stably expressing EGFP alone did not result in condensate

85 formation, confirming the essentiality of N for polyIC-induced condensate formation (Supplementary  
86 Figure 1B). Across all seven Ns, both constitutive and polyIC-induced condensates exhibit flow and  
87 fusion/coalescence over time (Figure 1C; Supplementary Figure 1C), which are behaviors consistent with  
88 liquid-liquid phase separation. We also probed the dynamics of the various N condensates by monitoring  
89 fluorescence recovery after photobleaching (FRAP). PolyIC-induced SARS-CoV/SARS-CoV-2/HCoV-  
90 OC43/MERS-CoV N condensates were much more dynamic than constitutive HCoV-229E/HCoV-  
91 NL63/HCoV-HKU1 condensates, exhibiting faster and more complete recovery of fluorescence after  
92 photobleaching (Figure 1D-E; Supplementary Figure 1D). Moreover, polyIC-induced HCoV-OC43/MERS-  
93 CoV N condensates displayed faster dynamics than polyIC-induced SARS-CoV/SARS-CoV-2 N  
94 condensates (Figure 1E, Supplementary Figure 1D). Overall, the seven HCoV N proteins exhibit varied  
95 basal phase separation propensities with constitutive condensates being less dynamic than polyIC-  
96 induced condensates, and in all cases, polyIC increased N condensation.

97 To gain insight into the specific regions of N that contribute to differences in basal phase separation  
98 behavior between species, we expressed ‘domain swap’ mutants of the SARS-CoV-2 and HCoV-229E N  
99 proteins in cells (Supplementary Figure 1E). We observed that individually replacing the SARS-CoV-2 N  
100 protein N-terminal domain (NTD) and central Ser/Arg (SR)-rich linker domains with the equivalent domains  
101 from HCoV-229E N results in a significant increase in basal phase separation propensity, suggesting that  
102 differences in the properties of the NTD and linker domains may explain the varied basal phase separation  
103 between the two N proteins.

#### 104 **High-content phenotypic screening for modulators of SARS-CoV-2 N condensation**

105 We hypothesized that modulating the phase behavior of SARS-CoV-2 N with small molecules may exert  
106 antiviral effects by perturbing the finely tuned dynamics of N condensates required for various stages of  
107 viral replication (Figure 2A). To identify compounds that promote or inhibit condensation of SARS-CoV-2  
108 N, we devised two parallel screens (Figures 2B-C, Supplementary Table 1). Briefly, to identify compounds  
109 that promote N condensation (henceforth referred to as pro-condensers), A549 cells stably expressing  
110 SARS-CoV-2 N-EGFP were treated with 10 $\mu$ M compounds for 24h (Figure 2B). To identify condensate  
111 inhibitors, 17h after compound addition, cells were treated with polyIC for 7h (Figure 2C). After fixing and  
112 staining, cells were imaged at 20X magnification and the number of N puncta per cell was scored by  
113 image analysis (Supplementary Figure 2A). Positive control compounds were MS023, a type I protein  
114 arginine methyltransferase inhibitor known to induce N condensation (36), and salvianolic acid B (SalB),  
115 a natural product identified in our pilot screen that robustly inhibited formation of polyIC-induced  
116 condensates. The Z' values for the pro-condensation and condensate inhibition screening modalities  
117 were 0.61 and 0.55 respectively. We performed both screening modalities against an annotated

118 compound library comprising 2,082 FDA-compounds and 472 additional bioactive compounds at 10 $\mu$ M  
119 in technical duplicate, with two biological replicates. This was followed by confirmation of compounds in  
120 dose response experiments with both the original screening assay (Supplementary Figure 2A) and  
121 separate follow up experiments with an independent image analysis pipeline (Supplementary Figure 2B).

## 122 **SARS-CoV-2 N pro-condensation screen identifies GSK3 and proteasome inhibitors**

123 After counter-screening to remove fluorescent artifacts, cytotoxic hits and compounds that act directly  
124 on EGFP, we identified six hit compounds that robustly increase the number of N puncta per cell (Figure  
125 3A-B). These fell into two classes by annotation and follow-up: inhibitors of the proteasomal catalytic core  
126 complex and GSK3 inhibitors. Proteasome inhibition could prevent N turnover, thereby increasing the  
127 concentration of N in cells and promoting its phase separation. However, we also observed an increase  
128 in N nuclear localization upon treatment of cells with the proteasome inhibitors (Supplementary Figure  
129 3A), suggesting that these small molecules may exert modulatory effects on N condensation through  
130 multiple mechanisms. Proteasome inhibition for cancer treatment has toxic side effects which preclude  
131 this target for anti-viral drugs, so this hit class was not pursued further.

132 We identified one ATP-competitive GSK3 inhibitor (CP21R7) as a pro-condenser hit (Figure 3B).  
133 Autophinib, a second pro-condenser hit originally annotated as a VPS34 ATP-competitive inhibitor of  
134 autophagy, robustly induced N condensation and was later found to be a GSK3 inhibitor (see below). We  
135 therefore tested five other ATP-competitive GSK3 inhibitors (6-BIO, Iaduviglusib, A1070722, CHIR-98014,  
136 LY2090314) as well as the Mg<sup>2+</sup>-competitive GSK3 inhibitor lithium chloride (LiCl) and found them to also  
137 induce N condensation, albeit with varying EC50s that spanned several orders of magnitude, with the  
138 most potent compound being LY2090314 (Supplementary Figures 3B-C). Mass spectrometry analysis of  
139 N phosphorylation upon 1 $\mu$ M LY2090314 treatment confirmed inhibition of phosphorylation  
140 predominantly at the start of the SR-rich region of the LKR domain as well as at four other minor  
141 phosphorylation sites within the disordered N- and C-terminal arms and the N-terminal RNA-binding  
142 domain (Supplementary Figure 3D). Conversely, 1 $\mu$ M CP21R7 inhibited phosphorylation of N to a smaller  
143 extent, consistent with the different EC50s and N condensation potencies for these two small molecules.

144 To test if GSK3 is indeed the relevant target of the pro-condenser compounds, we pursued gain- and  
145 loss-of-function experiments. We observed robust SARS-CoV-2 N condensation when cells were  
146 stimulated with Wnt3a ligand, which activates the Wnt signaling pathway and leads to GSK3 inhibition  
147 (Figure 3C). CRISPR-knockouts of GSK3 $\alpha/\beta$  recapitulated the effect of inhibitors, with CRISPR-knockouts  
148 of either kinase alone exhibiting a smaller effect than the double knockout (Figure 3D). Finally, site-  
149 directed mutagenesis of the 14 Ser residues within the SR-rich LKR region also recapitulated small

150 molecule-induced condensation of N (Supplementary Figure 3E), further validating the on-target activity  
151 of these compounds. These Wnt pathway and genetic data confirm GSK3 as the target of the small  
152 molecule inhibitors and suggest that GSK3 $\alpha$  and GSK3 $\beta$  play partially redundant roles in phosphorylating  
153 SARS-CoV-2 N and preventing its condensation, as they do for other proteins that are regulated by GSK3  
154 (37).

### 155 **ATP-competitive GSK3 inhibitors induce pan-HCoV N condensate hardening**

156 GSK3 was previously reported to regulate N from SARS-CoV and SARS-CoV-2 (27,29,38,39), but less  
157 closely related coronaviruses have not been tested. We thus followed up by treating all seven A549 cell  
158 lines expressing N-EGFP from the various human coronaviruses with all seven ATP-competitive GSK3  
159 inhibitors and analyzing N condensation. Robust and reproducible dose dependent N condensation was  
160 observed across all seven Ns (Figure 3E-F, Supplementary Figure 4A-B). These data suggest that  
161 regulation of N condensation by GSK3 is conserved among HCoVs, even though the sequences of  
162 divergent Ns are only ~25% identical. We also found that treatment of N proteins from the bat  
163 coronaviruses (bat-CoVs) RaTG13, WIV1, HKU4, HKU10 and HKU8 with the most potent GSK3 inhibitor,  
164 LY2090134, induced their phase separation (Supplementary Figure 4C). Overall, our data indicates that  
165 N condensation across all seven HCoVs as well as several bat-CoVs is negatively modulated by GSK3.  
166 However, the sensitivity of different HCoV Ns to the pro-condensation effects of GSK3 inhibitors varied  
167 considerably (Figure 3F). For example, HCoV-HKU1 and HCoV-NL63 N were much more sensitive to  
168 compound modulation than SARS-CoV-2 N, with EC50s for all compounds typically being one to two  
169 orders of magnitude lower compared to SARS-CoV-2 N, despite similar N expression levels  
170 (Supplementary Figure 1A).

171 Dephosphorylation of SARS-CoV-2 N by inhibition of GSK3 is thought to promote N phase transition from  
172 a liquid-like condensate state to a more gel-like, less dynamic state (29). We probed the dynamics of  
173 various HCoV N condensates in the absence or presence of our most potent GSK3 inhibitor LY2090314,  
174 using FRAP. We observed that LY2090314-induced SARS-CoV, SARS-CoV-2, HCoV-OC43 and HCoV-  
175 229E N condensates were less dynamic than their corresponding polyIC-induced condensates, with  
176 percentage recovery over two minutes decreasing from 53.3%/50.5%/70.8%/72.1% in the polyIC-  
177 treated condition to 6.8%/13.9%/35.6%/5.6% in the LY2090314-treated condition, respectively  
178 (Supplementary Figure 4D). LY2090314 treatment did not result in any statistically significant changes in  
179 percentage recovery for constitutive HCoV-229E, HCoV-NL63 and HCoV-HKU1 condensates, likely  
180 owing to the already slow dynamics of constitutive N condensates. Overall, this suggests that ATP-  
181 competitive GSK3 inhibitors are not only capable of inducing N aggregation from a basal soluble state,



182 but also result in hardened N condensates with much slower dynamics compared to polyIC-induced N  
183 condensates.

184 GSK3 has been considered as a therapeutic target for treatment of coronavirus infections (38-41), but a  
185 concern is possible toxicity. For GSK3-targeting inhibitors, the most relevant host pathway to consider  
186 for safety is canonical Wnt signaling through  $\beta$ -catenin, which is activated by GSK3 inhibition (42). This  
187 can drive hyperproliferation of epithelial cells in the gut, which is considered a negative safety signal (43).  
188 As a preliminary indicator of therapeutic index, we compared the inhibitor EC50 values obtained in our N  
189 condensation assays to EC50s for Wnt pathway activation. In addition to the ATP-competitive GSK3  
190 inhibitors listed above, we also tested two non-ATP competitive inhibitors (tideglusib, TDZD-8), of which  
191 tideglusib has been shown to not activate  $\beta$ -catenin signaling (44). We found a correlation between the  
192 EC50s for N condensation and Wnt signaling activation (via  $\beta$ -catenin activation) for the ATP-competitive  
193 inhibitors, with more potent pro-condensation GSK3 inhibitors such as LY2090314 also activating Wnt  
194 signaling at lower concentrations (Figure 3F, right). Conversely, the non-ATP competitive inhibitors were  
195 inactive on both assays (Figure 3F; Supplementary Figure 4A). These data suggest that for HCoV-like  
196 SARS-CoV-2, it will be difficult to separate the safety risk of Wnt signaling activation from N modulation,  
197 since inhibitor concentrations required for N modulation would also activate Wnt signaling. However,  
198 therapeutic modulation of N condensation may be viable in the case of HCoVs whose Ns are unusually  
199 sensitive to GSK3 inhibition, such as HCoV-NL63 and HCoV-HKU1, where drug exposure below the  
200 threshold for activating Wnt signaling might be anti-viral.

### 201 **SARS-CoV-2 N condensate inhibitor screen identifies compounds that inhibit the polyIC input**

202 Our condensation inhibition screen probed the same compound library. After counter-screening, we  
203 identified four hit compounds that robustly reduced the number of polyIC-induced N puncta per cell.  
204 These included three compounds annotated as Bcr-Abl/Src inhibitors (bosutinib, ponatinib and  
205 olverembatinib) as well as a plant-derived polyphenol, salvianolic acid B (SalB) (Figures 4A-B).

206 To test if these compounds act directly on N itself, or indirectly via a host factor, we tested whether they  
207 inhibited two endogenous pathways that are induced by transfection of polyIC, in particular, stress  
208 granule (SG) formation and IRF3 translocation into the nucleus triggered by RIG-I and related viral RNA  
209 sensors. Both pathways were measured using cell-based high content assays. At high concentrations,  
210 the three annotated kinase inhibitors (bosutinib, ponatinib and olverembatinib) inhibited SG formation  
211 triggered by polyIC or arsenite, as well as IRF3 nuclear localization triggered by polyIC or cGAMP (Figure  
212 4C, Supplementary Figure 5A). These data suggest action by polypharmacology. Bosutinib exhibited  
213 more potent activity against polyIC-triggered IRF3 translocation, suggesting a possibly interesting off-

214 target activity on that pathway. We also tested two other Bcr-Abl kinase inhibitors (nilotinib, imatinib) and  
215 two other Src kinase inhibitors (saracatinib, PP2) in our assay. None of the compounds resulted in robust  
216 dose-dependent inhibition of polyIC-induced N condensation (Supplementary Figure 5B), suggesting that  
217 the relevant target(s) may not be Abl or Src family kinases. Interestingly, treatment with nilotinib instead  
218 resulted in an increase in N condensation, suggesting an additional possible off-target N condensation  
219 mechanism. The polyphenol SalB was more specific, inhibiting only polyIC-induced SG formation and  
220 IRF3 nuclear localization (Figure 4C, Supplementary Figure 5A). Thus, all the condensate inhibitors act  
221 against the polyIC input into the assay, presumably by inhibiting host factors required for polyIC signaling.  
222 We suspect the kinase inhibitors block the polyIC input via kinase inhibition, but likely not by inhibition of  
223 their annotated primary targets Abl or Src.

224 We next sought to determine the species-specificity of the four active condensate inhibitors (bosutinib,  
225 ponatinib, olverembatinib, SalB). All four compounds also showed significant suppression of polyIC-  
226 induced SARS-CoV/SARS-CoV-2/HCoV-OC43/MERS-CoV N condensation (Figure 4D-E,  
227 Supplementary Figure 5C). However, we did not observe significant inhibition of the formation of  
228 constitutive HCoV-229E/HCoV-NL63/HCoV-HKU1 N condensates (Supplementary Figure 5D), further  
229 demonstrating that the activity of the condensate inhibitors is polyIC-dependent. No conclusive inhibition  
230 of polyIC-induced N condensates could be determined for HCoV-229E/HCoV-NL63/HCoV-HKU1 owing  
231 to the relatively small difference in number of N puncta per cell between the polyIC-induced state and  
232 basal condensation state (Supplementary Figure 5E).

### 233 **Condensate formation and anti-viral activity.**

234 The library we screened contains approved drugs and well-annotated tool compounds. Similar libraries  
235 have been screened by multiple groups for antiviral activity against HCoVs (45-50). Several of the GSK3,  
236 Src/Abl and proteasome inhibitors we identified as N condensation modulators were previously shown to  
237 have antiviral activity. The published data cover several HCoV species and several different cell lines  
238 (Figure 5A). In addition, for several of the GSK3 inhibitors, published antiviral IC50s showed correlation  
239 with the N condensation EC50s determined here; notably, the most potent pro-condenser compound  
240 LY2090314 also exhibits antiviral activity against HCoV-229E at low inhibitor concentrations (Figure 5B).  
241 This suggests that possible on-target activity on N condensation may be responsible for the antiviral  
242 activity of the GSK3 inhibitors, and that small molecule modulation of N condensation can exert antiviral  
243 activity.

### 244 **Discussion**



245 Biomolecular condensates play a role in cellular processes such as embryonic development, stress  
246 response and pathological aggregation of proteins, and are also critical for various stages of viral  
247 replication. In this study, we show that (1) N condensation is a common phenomenon across all seven  
248 HCoV, and (2) small molecules can promote or inhibit N condensation via perturbation of host targets,  
249 and this activity tends to be common across N proteins from all HCoV species tested (Figure 5C). Several  
250 of these small molecules are also active against multiple HCoV infection models. These data show that  
251 perturbation of viral condensate dynamics via host factors has the potential to generate drugs with  
252 antiviral activity across multiple viral species, including new pandemic species. Our approach also  
253 illustrates that cell-based screens using viral genes can predict potential anti-viral activity of small  
254 molecules without requiring access to whole virus infection models.

255 Our high content screens identified small molecule inhibitors of GSK3 that tune both the fraction of  
256 condensed N protein as well as the dynamics of N condensates. GSK3 has previously been proposed as  
257 a HCoV target (39-41). Our work reveals its pan-HCoV potential, but also highlights the safety risk  
258 associated with Wnt pathway activation. GSK3 is an abundant, constitutively active Ser/Thr kinase that  
259 phosphorylates a wide range of pre-primed substrates (51) and has previously been shown to  
260 phosphorylate both SARS-CoV and SARS-CoV-2 N along its SR-rich LKR region (27,29,38). In this study,  
261 we show that GSK3 inhibitors exhibit the same condensate modulating effects across all seven HCoV  
262 and five bat-CoV N proteins. These condensate-hardening inhibitors likely inhibit viral replication through  
263 on-target induction of N condensation/aggregation. In addition, several others have also demonstrated  
264 that GSK3 inhibitors are antiviral against various HCoVs (38,39,45,47). This further promotes GSK3 as  
265 candidate target for development of multi-CoV anti-virals and illustrates one of the major benefits of host-  
266 targeting to achieve broad-spectrum anti-viral activity (in addition to reduced risk of resistance  
267 development). However, as with any host target, a key concern is therapeutic index and toxicity due to  
268 perturbation of host pathways that depend on the target, in this case potentially oncogenic  $\beta$ -catenin  
269 signaling. For the HCoVs whose Ns are much more sensitive to compound modulation such as HCoV-  
270 NL63, it could be that anti-viral activity can be achieved with minimal activation of  $\beta$ -catenin signaling in  
271 live virus infection models. In addition, a follow-up would be to investigate the molecular basis behind the  
272 difference in sensitivity of various Ns to compound modulation, for example by determining if  
273 dephosphorylation occurs at lower concentrations of GSK3 inhibitors for more sensitive N proteins, or if  
274 these N proteins dephosphorylate at similar concentrations of inhibitor but require a lower degree of  
275 dephosphorylation to condense. Condensate targets offer novel avenues for optimization chemistry,  
276 notably the potential to increase on-target activity by partitioning of the drug into the condensate (52).  
277 Since viral and host condensates have different compositions, this effect should enable improvement of  
278 selectivity. We compared EC50 values for nine GSK3 inhibitors in N condensate versus Wnt activation

279 assays and found no compounds that were notably selective for the viral pathway over the host pathway  
280 (Figure 3F). Testing a larger library of GSK inhibitors, or a focused medicinal chemistry effort, might tease  
281 out selectivity between these pathways.

282 The N condensate inhibitors we identified appear to target the polyIC input to N condensation, as  
283 evidenced by their ability to block induction of polyIC-induced IRF3 translocation and SG assembly. A  
284 potentially causal relationship between SG induction and SARS-CoV-2 N condensation has been shown  
285 by others (21,53). The three kinase inhibitors we identified (bosutinib, ponatinib and olverembatinib) are  
286 annotated as targeting Bcr-Abl and Src. However, our investigation of additional potent Bcr-Abl and Src  
287 inhibitors failed to support this hypothesis. We currently suspect their activities, especially at  
288 concentrations of 1 $\mu$ M and higher, may be due to polypharmacology that could be resolved by kinase  
289 activity profiling and additional SAR.

290 The polyphenolic natural product SalB represents a class of compounds that has a broad range of  
291 biological effects and are considered not promising starts for medicinal chemistry. SalB selectively blocks  
292 polyIC input at some stage as evidenced by its inhibition of only polyIC-induced IRF3 activation and SG  
293 formation. However, its polypharmacology raises the possibility that it may also act directly on N by  
294 physically inhibiting N-RNA or general RNA-protein interactions. It was shown in a previous study that  
295 another polyphenol natural product, (-)-gallocatechin gallate, is able to disrupt SARS-CoV-2 N  
296 condensation through direct interference of N-RNA binding (54). Taken together, the condensate  
297 inhibitors demonstrate that small molecules are capable of disrupting liquid-liquid phase separation of  
298 HCoV N proteins through varied mechanisms.

299 The use of the FDA approved library that has been screened several times for anti-viral activity allows us  
300 to see a potential correlation with condensate formation and virus infectivity. However, one of the  
301 limitations of screening with an annotated FDA-approved library is the lack of diversity in pharmacological  
302 targets. Screening a larger, more chemically diverse compound library is a natural next step for our  
303 approach. Additionally, while our primary goal in screening for modulators of HCoV N condensates was  
304 to identify targets for treating COVID-19 and other HCoV infections, our approach is also relevant to other  
305 diseases where ribonucleoprotein (RNP) aggregates have been causally implicated. Neurological  
306 diseases such as Huntington's disease, spinocerebellar ataxia and Fragile X syndrome arise from  
307 nucleotide repeat expansions in non-coding RNA that give rise to pathological nuclear RNP granules (55).  
308 Similarly, pathological cytoplasmic RNP inclusions of mutant variants of the Fused in Sarcoma (FUS)  
309 protein are the hallmark of ALS (56-58). In addition to its role in virus infections, double-stranded RNA  
310 signaling may also underly neurodegeneration caused by the *C9ORF72* locus (59). Taken together, the  
311 ability to screen for condensate dynamics as a therapeutic target supports the value of moving forward

312 with larger more diverse compound libraries to reveal novel condensate biology in both viral infections as  
313 well as in other indications such as neurological diseases.

## 314 **Materials and Methods**

### 315 **Cell lines and cell culture**

316 HEK293T/17 (CRL-11268) and A549 (CCL-185) cells were purchased from ATCC. BJ-5ta  $\Delta$ cGAS cells  
317 were obtained from Dr. Tai L. Ng (Harvard Medical School). HEK293T/17 cells and BJ-5ta  $\Delta$ cGAS cells  
318 were maintained in Dulbecco's Modified Eagle Medium (DMEM; ATCC 30-2002) supplemented with 10%  
319 fetal bovine serum (FBS; Gibco 10438026), 1,000U/mL penicillin-streptomycin (Gibco 15140122) and  
320 100 $\mu$ g/mL normocin (Invivogen ant-nr-1). Wild-type A549 cells were maintained in F-12K medium (ATCC  
321 30-2004) supplemented with 10% FBS, 1,000U/mL penicillin-streptomycin and 100 $\mu$ g/mL normocin or  
322 DMEM supplemented with 10% FBS. A549 stable cell lines expressing various HCoV N-EGFP were  
323 maintained in full F-12K culture medium with 1.5 $\mu$ g/mL puromycin (Gibco A1113803). Cells were  
324 maintained at 37°C and 5% CO<sub>2</sub> in a humidified environment and subcultured twice a week by DPBS  
325 washing (Gibco 14190250) followed by trypsinization (Corning MT25053Cl) from 90% to 20% confluence.

### 326 **Plasmid construct generation**

327 The pHAGE lentiviral plasmid encoding SARS-CoV-2 N-EGFP was obtained from Dr. Adrian Salic  
328 (Harvard Medical School). Plasmid vectors containing SARS-CoV, HCoV-OC43, HCoV-229E, HCoV-NL63,  
329 HCoV-HKU1 and MERS-CoV N sequences were obtained from Dr. Tai L. Ng (Harvard Medical School).  
330 pHAGE lentiviral plasmids encoding the six other HCoV N-EGFP were generated by replacing SARS-  
331 CoV-2 N with the respective HCoV N sequences by PCR (New England Biolabs M0492S) and NEBuilder  
332 HiFi DNA Assembly (New England Biolabs E2621S). Oligonucleotides used for PCR were obtained from  
333 Genewiz, and plasmids were verified by Sanger sequencing at Genewiz. The pHAGE plasmid encoding  
334 SARS-CoV-2 N<sup>SAmut</sup>-EGFP was synthesized by Twist.

### 335 **Stable A549 cell line generation**

336 Stable A549 cell lines expressing the seven HCoV N-EGFP were generated by lentiviral transduction  
337 followed by 1.5 $\mu$ g/mL puromycin selection. 12 $\mu$ g of each pHAGE lentiviral construct encoding the various  
338 HCoV N-EGFP were co-transfected with 18 $\mu$ g of the psPAX2 (Addgene #12260) and 6 $\mu$ g of the pMD2.G  
339 (Addgene #12259) 2<sup>nd</sup> generation lentiviral packaging plasmids into HEK293T/17 cells at 70% confluency  
340 in T75 flasks with Lipofectamine3000 (Invitrogen L3000015). After 6-24h, transfection medium was  
341 removed and replaced with full DMEM. Culture medium containing lentivirus was collected after a  
342 subsequent 24h and 48h and combined. Virus-containing medium was centrifuged at 400xg for 5 min to

343 pellet cell debris before filtering through a 0.45µm Durapore PVDF membrane Steriflip (Millipore  
344 SE1M003M00). 4X Lenti-X Concentrator (TaKaRa 631232) was then added to the filtered virus-containing  
345 medium, incubated at 4°C for 1h, then centrifuged at 1,500xg for 45 min. After centrifugation, the  
346 supernatant was removed and the virus pellet was resuspended in 1/10<sup>th</sup> the original volume of harvested  
347 supernatant, in complete medium without antibiotics. Two days before transduction, 250,000 A549 cells  
348 were plated in each well of a 6-well plate, and transductions were performed by replacing wells with  
349 1.5mL of concentrated virus, 0.4mL of 10X polybrene (Millipore TR-1003-G) and 2.1mL of complete  
350 medium without antibiotics. Cells were incubated for 36-48h before virus removal and expansion into  
351 1.5µg/mL puromycin-containing selection medium. After selection recovery, stable pools of cells were  
352 analyzed by qualitative fluorescence microscopy and expanded for liquid nitrogen storage in 90% FBS,  
353 10% DMSO.

### 354 **SDS-PAGE and western blots**

355 Cells were seeded at 10,000 cells/well in 96-well plates and treated accordingly. Cells were washed once  
356 with ice-cold PBS, then lysed in 50µL ice-cold lysis buffer comprising 25mM Tris-HCl pH7.4, 150mM  
357 NaCl, 1% Triton X-100 (Millipore X100), 1X Halt protease inhibitor (Thermo Scientific 87785) and 1U/µL  
358 Benzonase (Millipore E1014). Samples were boiled with an equal volume of 2X Laemmli sample buffer  
359 (Bio-Rad 1610737) containing β-mercaptoethanol for 10 min before running on an SDS-PAGE gel  
360 (Invitrogen XP10205BOX). Gels were transferred onto nitrocellulose membranes using the iBlot 2 Dry  
361 Blotting System (Invitrogen IB23002) and blocked in SuperBlock™ (TBS) Blocking Buffer (Thermo  
362 Scientific 37535) for 1h at RTP. Primary antibodies (HRP anti-GFP antibody [Abcam ab190584]; rabbit  
363 anti-GSK3α antibody [Cell Signaling Technology 4818S]; rabbit anti-GSK3β antibody [Cell Signaling  
364 Technology 9315S]) were diluted in Pierce™ Protein-Free T20 (TBS) Blocking Buffer (Thermo Scientific  
365 37571) as recommended and incubated overnight at 4°C, shaking. Membranes were then washed thrice  
366 with TBS + 0.2% Tween-20. For HRP anti-GFP antibody samples, membranes were treated with  
367 SuperSignal™ West Femto Maximum Sensitivity Substrate (Thermo Scientific 34095) before visualization  
368 with a Bio-Rad imager. For all other antibodies, membranes were incubated with goat anti-Rabbit IgG  
369 (H+L) Secondary Antibody, DyLight™ 680 (Invitrogen 35568) diluted in Pierce™ Protein-Free T20 (TBS)  
370 Blocking Buffer (Thermo Scientific 37571) as recommended for 1h at RTP. Membranes were then washed  
371 again thrice with TBS + 0.2% Tween-20 before visualization with a Bio-Rad imager.

### 372 **Fluorescence microscopy**

373 For qualitative confocal fluorescence imaging, cells were imaged with a Nikon Ti fluorescence microscope  
374 equipped with a Yokogawa CSU-W1 spinning disk confocal scanner, Nikon LUN-F XL solid state laser

375 combiner, Hamamatsu ORCA-Fusion BT CMOS camera, motorized stage and shutters and Lumencor  
376 SOLA fluorescence light source. Cells were seeded in 24-well or 96-well high performance #1.5 cover  
377 glass bottom plates (Cellvis P24-1.5H-N; P96-1.5H-N) at 100,000 or 10,000 cells/well in full medium  
378 without antibiotics and were typically imaged 24-48h after seeding. N-EGFP was imaged with a 488nm  
379 laser and ET525/50m filter (Chroma), while Hoechst staining was imaged with a 405nm laser and  
380 ET455/50m filter (Chroma). For qualitative widefield fluorescence imaging, cells were imaged with a Nikon  
381 Ti2 fluorescence microscope equipped with a Hamamatsu Flash 4.0 LT camera and a SOLA fluorescence  
382 light source. Cells were seeded in 96-well black wall, clear bottom plates (Corning 9603) at 10,000  
383 cells/well in full medium without antibiotics and were typically imaged 24-48h after seeding. N-EGFP was  
384 imaged with a 466/40 excitation filter and a 525/50 emission filter.

### 385 **Fluorescence recovery after photobleaching (FRAP)**

386 FRAP experiments were performed on a DeltaVision OMX Blaze microscope equipped with a 60x/1.42  
387 Plan Apo oil objective (Olympus), a 488nm laser and a PCO edge Front Illuminated sCMOS camera. N-  
388 EGFP was imaged with an LED, 477/32nm bandpass filter and 528/48nm emission filter. Bleaching of N-  
389 EGFP was performed with a 488nm laser. For each experimental sample, seven condensates were  
390 bleached within a circular region of about 1.2  $\mu\text{m}$  diameter at 31.3% laser transmission for 50 ms. A total  
391 of 120 frames were recorded at one frame per 2s, for a total of 2 min (two frames recorded prior to bleach  
392 event, followed by 117 subsequent post-bleach frames). Images were processed in FIJI software (NIH).  
393 The fluorescence intensity of a 0.32  $\mu\text{m}$ -diameter circular region of interest (ROI) within the bleached spot  
394 was monitored over time ( $I_{\text{bleached}}$ ). The fluorescence intensity within the same ROI pre-bleaching ( $I_{\text{pre-bleach}}$ )  
395 and immediately post-bleaching ( $I_{\text{post-bleach}}$ ) were also recorded. The fluorescence intensity of a separate  
396 rectangular ROI of 2.72  $\mu\text{m}$  diameter away from one bleached ROI per sample was monitored over time  
397 ( $I_{\text{background}}$ ). The FRAP recovery intensities at any given time point ( $I_t$ ) were calculated as follows:

$$398 \quad I_t = \frac{I_{\text{bleached}} - I_{\text{background}}}{I_{\text{pre-bleached}}}$$

399 The curves obtained were then normalized as follows:

$$400 \quad \text{Normalization} = \frac{I_t - I_{\text{post-bleach}}}{1 - I_{\text{post-bleach}}}$$

401 The mean and standard deviation of the final normalized values were plotted for seven condensates per  
402 experimental condition, and the final normalized recovery value was taken as the percentage recovery for  
403 each condition.

## 404 High content compound screening and follow-up experiments

405 The primary screen was performed at AbbVie as follows. Briefly, cells were seeded in Perkin Elmer LLC  
406 ViewPlate-384 well black, optically clear bottom plates at 2,000 cells/well and incubated overnight. The  
407 Selleck compound library (2,554 compounds) was added at a final concentration of 10 $\mu$ M and incubated  
408 overnight on duplicate plates. Plates for the condensate inhibition screen were additionally transfected  
409 with a final concentration of 1 $\mu$ g/mL polyIC 17h after compound addition to induce N condensation and  
410 incubated for a further 7 hours. All plates for both the pro-condensation and condensation inhibition  
411 screens were fixed with 3% formaldehyde and nuclei stained with Hoechst 33342 for nuclear identification.  
412 Plates were scanned on the Thermo Fisher CX7 LZR using a 20x objective and widefield imaging mode.  
413 Nuclei staining was imaged with the 405LZR\_BGFR\_BGFR filter. GFP was imaged with the  
414 488LZR\_BGFR\_BGFR filter. Images were analyzed with automatic image analysis as described below.  
415 The Z' for both the pro-condensation and condensation inhibition assays were calculated as follows:

$$416 \quad Z' = \frac{3(\sigma_{pos} + \sigma_{neg})}{|\mu_{pos} + \mu_{neg}|}$$

417 where  $\sigma_{pos}$  = SD of positive control,  $\sigma_{neg}$  = SD of negative control (DMSO),  $\mu_{pos}$  = mean of positive control,  
418  $\mu_{neg}$  = mean of negative control (DMSO). For visualization of screening data (Figures 3A and 4A), % activity  
419 compared to DMSO control was calculated as follows:

$$420 \quad \% \text{ activity} = \frac{(cMax - experimental)}{(cMax - cMin)} \times 100$$

421 For the pro-condensation screen, cMax = mean number of puncta per cell for positive control MS023 and  
422 cMin = mean number of puncta per cell for negative control DMSO. For the condensation inhibition screen,  
423 cMax = mean number of puncta per cell for negative control DMSO and cMin = mean number of puncta  
424 per cell for positive control salvianolic acid B.

425 Follow-up experiments with hit compounds across all seven HCoV N-expressing A549 cell lines were  
426 performed at Harvard Medical School as above with slight modifications. All hit compounds were re-  
427 purchased for testing (see compound table below). Cells were seeded in 384-well PerkinElmer  
428 PhenoPlate 384-well black plates (PerkinElmer; 6057302) at 2,500 cells/well with the Thermo Multidrop™  
429 Combi reagent dispenser and drugs were added in dose-response format with the HP D300e digital  
430 dispenser. After fixation and staining with 1 $\mu$ g/mL Hoechst 33342 (Thermo Scientific 62249) and 5 $\mu$ g/mL  
431 CellMask™ Deep Red Plasma membrane Stain (Invitrogen C10046), plates were imaged with  
432 MetaXpress (version 6.7) on a Molecular Devices ImageXpress Micro Confocal Laser (IXM-C LZR)  
433 microscope equipped with a spinning disk confocal scanner, a high-quantum efficiency sCMOS detection



434 camera and a Lumencor Celesta light engine. Cells were seeded in 96-well high performance #1.5 cover  
435 glass bottom plates (Cellvis P96-1.5H-N) or 384-well PerkinElmer PhenoPlate 384-well black plates  
436 (PerkinElmer 6057302) at 10,000 or 2,500 cells/well in full medium without antibiotics. Specimens were  
437 sampled with a 40x/0.95 air objective lens (Nikon) at a pixel size of 0.16 $\mu$ m/pixel. N-EGFP was imaged  
438 with a 477nm laser, 488nm dichroic filter and 520/25nm emission filter, while samples stained for  
439 immunofluorescence were imaged with a 546nm laser, 593nm dichroic filter and 624/40nm emission filter.  
440 Hoechst staining was imaged with a 405nm laser, 421nm dichroic filter and 452/45nm emission filter,  
441 while CellMask™ Deep Red Plasma membrane staining was imaged with a 638nm laser, 656nm dichroic  
442 filter and 692/40nm emission filter. All images were processed in FIJI software (NIH) and analyzed with  
443 automatic image analysis as described below.

#### 444 **Automatic image analysis**

445 Image analysis for the primary screen as well as follow-up experiments were performed at AbbVie and  
446 HMS respectively with independent image analysis pipelines that demonstrated highly reproducible  
447 results. At AbbVie, image analysis was performed using SpotDetector.V4 algorithm and is summarized in  
448 Supplementary Figure 2A. The output feature SpotCountPerObject was used to evaluate the changes in  
449 N protein aggregation in both screens. Compounds that showed activity greater than two standard  
450 deviations from the mean based on control % activity were selected. After visual inspection to remove  
451 artifacts and false positives, 25 pro-condensation and 44 condensate inhibiting compounds were tested  
452 using six-point CRC using the same assays described above. Six pro-condensers and four condensate  
453 inhibitors confirmed with EC50/IC50 and were identified as hits. At Harvard Medical School, image  
454 analysis for follow-up experiments was performed with Molecular Devices MetaXpress software with  
455 customized image analysis pipelines for quantification of N puncta and is summarized in Supplementary  
456 Figure 2B. For quantification of N puncta upon treatment with the pro-condensation proteasome inhibitors,  
457 thresholds for the image analysis pipeline were modified slightly to enable more robust and accurate  
458 identification of smaller and dimmer puncta. For dose response experiments, mean values were fit with a  
459 three-parameter curve in Prism (GraphPad 9).

#### 460 **Mass spectrometry**

461 For detection of N phosphorylation states, A549 SARS-CoV-2 N-EGFP cells were seeded in T-25 flasks  
462 at 40% confluency overnight before treatment with DMSO, 1 $\mu$ M LY2090314 or 1 $\mu$ M CP21R7 for a further  
463 24h. Cells were then lysed with ice cold RIPA lysis buffer (supplemented with NaCl to a final concentration  
464 of 300mM) + 1X Halt protease and phosphatase inhibitor for 10min at 4°C. Cell lysates were then  
465 subjected to immunoprecipitation with GFP Selector resin (NanoTag Biotechnologies N0310-L) according

466 to manufacturer's protocol. After the final wash, the resin containing sample was resuspended in 50 $\mu$ L  
467 wash buffer before addition of 50 $\mu$ L 2X Laemmli sample buffer and subjected to SDS-PAGE. Gel bands  
468 were excised and submitted for mass spectrometry analysis at the Taplin Mass Spectrometry facility in  
469 Harvard Medical School (60). Data presented indicates percentage of each peptide that is phosphorylated  
470 as determined by peak intensity values.

#### 471 **Generation of A549 SARS-CoV-2 N-EGFP GSK3 $\alpha$ , GSK3 $\beta$ and GSK3 $\alpha$ / $\beta$ CRISPR knockout cells**

472 Stable A549 SARS-CoV-2 N-EGFP GSK3 $\alpha$ , GSK3 $\beta$  and GSK3 $\alpha$ / $\beta$  knockout cell lines were generated by  
473 lentiviral transduction of lentiCas9-Blast and GSK3 $\alpha$  and/or GSK3 $\beta$  gRNAs followed by 1.5 $\mu$ g/mL  
474 puromycin and 10 $\mu$ g/mL blasticidin selection. lentiCas9-Blast was a gift from Feng Zhang (Addgene  
475 plasmid #52962) (61), while all GSK3 $\alpha$ , GSK3 $\beta$  and non-targeting control gRNAs were a gift from John  
476 Doench & David Root (Addgene plasmids #77281, #77282, #77283, #76370, #76371, #76372, #80248,  
477 #80263) (62). Lentiviral pools containing GSK3 $\alpha$ , GSK3 $\beta$  and non-targeting control gRNAs were generated  
478 as described earlier and transduced into the A549 SARS-CoV-2 N-EGFP cell line. After selection recovery,  
479 stable pools of cells were analyzed by quantitative fluorescence microscopy.

#### 480 **Wnt pathway reporter assay**

481 Mouse embryonic fibroblasts (MEFs) cells stably expressing a firefly luciferase gene under the control of  
482 TCF/LEF response element and Renilla luciferase under the control of a constitutive promoter were used  
483 to measure Wnt pathway activation (63). Cells were plated in 96-well plates and grown to confluence for  
484 24h, and then treated in triplicate with the indicated GSK3 inhibitors in serum-free DMEM for 24 h.  
485 Luminescence was measured from cell lysates using the Dual-Glo Luciferase Assay System (Promega  
486 E1910) in a Victor3 Multilabel Plate Reader (Perkin-Elmer). Relative luciferase is represented as mean  
487 Firefly/Renilla ratio, with error bars representing standard deviation. Experiments were performed in dose  
488 response format, and mean values were fit with a four-parameter curve in Prism (GraphPad 9) to obtain  
489 EC50 values.

#### 490 **Immunofluorescence staining for quantification of IRF3 nuclear/cytoplasmic ratios and SG** 491 **formation**

492 Cells were seeded in 384-well PerkinElmer PhenoPlate 384-well black plates (PerkinElmer 6057302) at  
493 2,500 cells/well. To observe the effect of compounds on IRF3 activation and nuclear translocation,  
494 A549/BJ-5ta  $\Delta$ cGAS cells were treated with compounds for a total of 17h/22h before addition of 1 $\mu$ g/mL  
495 transfected polyIC/100 $\mu$ g/mL cGAMP for an additional 7h/2h respectively. To observe the effect of  
496 compounds on stress granule formation, A549 cells were treated with compounds for a total of 17h/23h

497 before addition of 1µg/mL transfected polyIC/0.5mM NaAsO<sub>2</sub> for an additional 7h/1h respectively. Cells  
498 were then fixed with 4% paraformaldehyde for 20 min, washed thrice with 1X PBS and blocked in PBS +  
499 0.1% Triton X-100 (Sigma-Aldrich X100) + 5% bovine serum albumin for 1h at RTP. Plates were then  
500 incubated overnight at 4°C with primary antibodies (rabbit anti-IRF3 antibody [Cell Signaling Technology  
501 11904S]; rabbit anti-G3BP1 antibody [Abcam ab181149]) diluted in PBS + 0.1% Triton X-100 (Sigma-  
502 Aldrich X100) + 1% bovine serum albumin at recommended concentrations. Plates were washed thrice  
503 with 1X PBS before incubation with goat anti-Mouse IgG (H+L) Cross-Adsorbed Secondary Antibody,  
504 Alexa Fluor™ 568 (Invitrogen A-11004), 1µg/mL Hoechst 33342 and 5µg/mL CellMask™ Deep Red  
505 Plasma membrane Stain in the same dilution buffer for 1h at RTP. Plates were washed thrice again with  
506 1X PBS before imaging with the IXM-C LZR as described earlier. Image analysis was performed with  
507 Molecular Devices MetaXpress software with customized image analysis pipelines for quantification of  
508 nuclear/cytoplasmic ratios of IRF3 and quantification of G3BP1 puncta. Briefly, for quantification of  
509 nuclear/cytoplasmic ratios of IRF3, nuclei and cytoplasm areas were defined by Hoechst and CellMask  
510 staining respectively, and the ratio of the average fluorescence intensity of IRF3 in the nucleus to  
511 cytoplasm was determined (total integrated intensity divided by total area) for each cell. For quantification  
512 of G3BP1 puncta, a customized pipeline similar to that utilized for N puncta quantification was used. Data  
513 for ponatinib and olverembatinib is presented up to 5µM concentration due to slight compound toxicity  
514 affecting the quality of image analysis.

### 515 **Compounds/stimuli for follow up experiments**

516 All hit compounds were re-purchased for follow up experiments and validation at Harvard Medical School.  
517 Sources of all compounds used in this paper are shown in the table below. Sources of LiCl and Wnt3a  
518 ligand used in this paper are also indicated below.

| <b>Compound/stimuli</b> | <b>Source</b>  | <b>Catalog no.</b> | <b>Format</b>    |
|-------------------------|----------------|--------------------|------------------|
| CP21R7                  | MedChemExpress | HY-100207          | 10mM in 1mL DMSO |
| Autophinib              | MedChemExpress | HY-101920          | 10mM in 1mL DMSO |
| Bortezomib              | MedChemExpress | HY-10227           | 10mM in 1mL DMSO |
| Carfilzomib             | MedChemExpress | HY-10455           | 10mM in 1mL DMSO |
| Ixazomib citrate        | MedChemExpress | HY-10452           | 10mM in 1mL DMSO |
| Oprozomib               | MedChemExpress | HY-12113           | 10mM in 1mL DMSO |
| 6-BIO                   | MedChemExpress | HY-10580           | 10mM in 1mL DMSO |
| Laduviglusib            | MedChemExpress | HY-10182           | 10mM in 1mL DMSO |
| A1070722                | MedChemExpress | HY-107531          | 10mM in 1mL DMSO |
| CHIR-98014              | MedChemExpress | HY-13076           | 10mM in 1mL DMSO |
| LY2090314               | MedChemExpress | HY-16294           | 10mM in 1mL DMSO |
| Tideglusib              | MedChemExpress | HY-14872           | 10mM in 1mL DMSO |
| TDZD-8                  | MedChemExpress | HY-11012           | 10mM in 1mL DMSO |
| Bosutinib               | MedChemExpress | HY-10158           | 10mM in 1mL DMSO |

|                                        |                |                |                  |
|----------------------------------------|----------------|----------------|------------------|
| Olverembatinib dimesylate              | MedChemExpress | HY-15666A      | 10mM in 1mL DMSO |
| Ponatinib                              | MedChemExpress | HY-12047       | 10mM in 1mL DMSO |
| Salvianolic acid B                     | MedChemExpress | HY-N1362       | 5mg              |
| Imatinib                               | MedChemExpress | HY-15463       | 10mM in 1mL DMSO |
| Saracatinib                            | MedChemExpress | HY-10234       | 10mM in 1mL DMSO |
| PP2                                    | MedChemExpress | HY-13805       | 10mM in 1mL DMSO |
| LiCl                                   | Sigma-Aldrich  | L9650          | 100g             |
| Recombinant mouse Wnt3a (carrier-free) | R&D Systems    | 1324-WN-010/CF | 10µg             |

## 519 **Acknowledgements**

520 This work was sponsored by a research alliance with AbbVie Inc. Rui Tong Quek was supported by the  
521 Agency for Science, Technology and Research NSS (PhD) predoctoral fellowship. The content and  
522 conclusions included in this document are solely those of the authors and do not necessarily represent  
523 official views of any funders. We thank the Nikon Imaging Center at HMS for help with fluorescence  
524 microscopy, the Taplin Mass Spectrometry Facility at HMS for help with mass spectrometry, and the  
525 ICCB-Longwood Screening Facility at HMS, in particular Dr. Clarence Yapp for assistance with image  
526 analysis and for access to high-throughput screening equipment.

527 R.T.Q. and K.S.H. generated cell lines and designed the high-throughput screening assay. S.G.W.  
528 performed the high-throughput small molecule screens and validation of hits. D.T.N. designed custom  
529 image analysis pipelines and assisted with image analysis. T.A.M. performed the Wnt reporter assays and  
530 processed the data. R.T.Q. performed qualitative imaging, follow up/mechanistic assays, data analyses  
531 and wrote the manuscript. S.M.G., P.A.S. and T.J.M. managed the team, assisted with data analysis and  
532 interpretation and provided scientific insight and advice on writing the paper. AbbVie participated in the  
533 study design and execution of experiments including the interpretation of data, review and approval of  
534 the publication. AbbVie provided financial support for this research. All authors provided critical feedback  
535 for the manuscript.

536 The authors declare no competing interests.

537

## 538 References

- 539 1. Boeynaems, S., Alberti, S., Fawzi, N. L., Mittag, T., Polymenidou, M., Rousseau, F., Schymkowitz,  
540 J., Shorter, J., Wolozin, B., Van Den Bosch, L., Tompa, P., and Fuxreiter, M. (2018) Protein Phase  
541 Separation: A New Phase in Cell Biology. *Trends Cell Biol* **28**, 420-435
- 542 2. Banani, S. F., Lee, H. O., Hyman, A. A., and Rosen, M. K. (2017) Biomolecular condensates:  
543 organizers of cellular biochemistry. *Nature Reviews Molecular Cell Biology* **18**, 285-298
- 544 3. Shin, Y., and Brangwynne, C. P. (2017) Liquid phase condensation in cell physiology and disease.  
545 *Science* **357**, eaaf4382
- 546 4. Zhao, Y. G., and Zhang, H. (2020) Phase Separation in Membrane Biology: The Interplay between  
547 Membrane-Bound Organelles and Membraneless Condensates. *Developmental Cell* **55**, 30-44
- 548 5. Lahaye, X., Vidy, A., Pomier, C., Obiang, L., Harper, F., Gaudin, Y., and Blondel, D. (2009)  
549 Functional Characterization of Negri Bodies (NBs) in Rabies Virus-Infected Cells: Evidence that  
550 NBs Are Sites of Viral Transcription and Replication. *J Virol* **83**, 7948-7958
- 551 6. Nikolic, J., Le Bars, R., Lama, Z., Scrima, N., Lagaudrière-Gesbert, C., Gaudin, Y., and Blondel,  
552 D. (2017) Negri bodies are viral factories with properties of liquid organelles. *Nature*  
553 *Communications* **8**, 58
- 554 7. Heinrich Bianca, S., Maliga, Z., Stein David, A., Hyman Anthony, A., Whelan Sean, P. J., and  
555 Palese, P. Phase Transitions Drive the Formation of Vesicular Stomatitis Virus Replication  
556 Compartments. *mBio* **9**, e02290-02217
- 557 8. Heinrich, B. S., Cureton, D. K., Rahmeh, A. A., and Whelan, S. P. J. (2010) Protein expression  
558 redirects vesicular stomatitis virus RNA synthesis to cytoplasmic inclusions. *PLoS Pathog* **6**,  
559 e1000958-e1000958
- 560 9. Rincheval, V., Lelek, M., Gault, E., Bouillier, C., Sitterlin, D., Blouquit-Laye, S., Galloux, M., Zimmer,  
561 C., Eleouet, J.-F., and Rameix-Welti, M.-A. (2017) Functional organization of cytoplasmic inclusion  
562 bodies in cells infected by respiratory syncytial virus. *Nature Communications* **8**, 563
- 563 10. Hoenen, T., Shabman, R. S., Groseth, A., Herwig, A., Weber, M., Schudt, G., Dolnik, O., Basler,  
564 C. F., Becker, S., and Feldmann, H. (2012) Inclusion bodies are a site of ebolavirus replication. *J*  
565 *Virology* **86**, 11779-11788
- 566 11. Guseva, S., Milles, S., Jensen, M. R., Salvi, N., Kleman, J.-P., Maurin, D., Ruigrok, R. W. H., and  
567 Blackledge, M. (2020) Measles virus nucleo- and phosphoproteins form liquid-like phase-  
568 separated compartments that promote nucleocapsid assembly. *Science advances* **6**, eaaz7095-  
569 eaaz7095
- 570 12. Zhou, Y., Su Justin, M., Samuel Charles, E., Ma, D., and Dutch Rebecca, E. Measles Virus Forms  
571 Inclusion Bodies with Properties of Liquid Organelles. *J Virol* **93**, e00948-00919
- 572 13. Katoh, H., Kubota, T., Kita, S., Nakatsu, Y., Aoki, N., Mori, Y., Maenaka, K., Takeda, M., and  
573 Kidokoro, M. (2015) Heat shock protein 70 regulates degradation of the mumps virus  
574 phosphoprotein via the ubiquitin-proteasome pathway. *J Virol* **89**, 3188-3199
- 575 14. Carlos, T. S., Young, D. F., Schneider, M., Simas, J. P., and Randall, R. E. (2009) Parainfluenza  
576 virus 5 genomes are located in viral cytoplasmic bodies whilst the virus dismantles the interferon-  
577 induced antiviral state of cells. *J Gen Virol* **90**, 2147-2156
- 578 15. Zhang, S., Chen, L., Zhang, G., Yan, Q., Yang, X., Ding, B., Tang, Q., Sun, S., Hu, Z., and Chen,  
579 M. (2013) An amino acid of human parainfluenza virus type 3 nucleoprotein is critical for template  
580 function and cytoplasmic inclusion body formation. *J Virol* **87**, 12457-12470
- 581 16. Ringel, M., Heiner, A., Behner, L., Halwe, S., Sauerhering, L., Becker, N., Dietzel, E., Sawatsky, B.,  
582 Kolesnikova, L., and Maisner, A. (2019) Nipah virus induces two inclusion body populations:  
583 Identification of novel inclusions at the plasma membrane. *PLoS Pathog* **15**, e1007733-e1007733
- 584 17. Patton, J. T., Silvestri, L. S., Tortorici, M. A., Vasquez-Del Carpio, R., and Taraporewala, Z. F.  
585 (2006) Rotavirus Genome Replication and Morphogenesis: Role of the Viroplasm. in *Reoviruses:*  
586 *Entry, Assembly and Morphogenesis* (Roy, P. ed.), Springer Berlin Heidelberg, Berlin, Heidelberg.  
587 pp 169-187



- 588 18. Silvestri, L. S., Taraporewala, Z. F., and Patton, J. T. (2004) Rotavirus replication: plus-sense  
589 templates for double-stranded RNA synthesis are made in viroplasms. *J Virol* **78**, 7763-7774
- 590 19. Tenorio, R., Fernández de Castro, I., Knowlton, J. J., Zamora, P. F., Sutherland, D. M., Risco, C.,  
591 and Dermody, T. S. (2019) Function, Architecture, and Biogenesis of Reovirus Replication  
592 Neorganelles. *Viruses* **11**, 288
- 593 20. Nevers, Q., Albertini, A. A., Lagaudrière-Gesbert, C., and Gaudin, Y. (2020) Negri bodies and other  
594 virus membrane-less replication compartments. *Biochim Biophys Acta Mol Cell Res* **1867**,  
595 118831-118831
- 596 21. Savastano, A., Ibáñez de Opakua, A., Rankovic, M., and Zweckstetter, M. (2020) Nucleocapsid  
597 protein of SARS-CoV-2 phase separates into RNA-rich polymerase-containing condensates.  
598 *Nature Communications* **11**, 6041
- 599 22. Cong, Y., Ulasli, M., Schepers, H., Mauthe, M., V'Kovski, P., Kriegenburg, F., Thiel, V., de Haan,  
600 C. A. M., and Reggiori, F. (2020) Nucleocapsid Protein Recruitment to Replication-Transcription  
601 Complexes Plays a Crucial Role in Coronaviral Life Cycle. *J Virol* **94**, e01925-01919
- 602 23. Iserman, C., Roden, C. A., Boerneke, M. A., Sealfon, R. S. G., McLaughlin, G. A., Jungreis, I.,  
603 Fritch, E. J., Hou, Y. J., Ekena, J., Weidmann, C. A., Theesfeld, C. L., Kellis, M., Troyanskaya, O.  
604 G., Baric, R. S., Sheahan, T. P., Weeks, K. M., and Gladfelter, A. S. (2020) Genomic RNA Elements  
605 Drive Phase Separation of the SARS-CoV-2 Nucleocapsid. *Molecular Cell* **80**, 1078-1091.e1076
- 606 24. Chen, H., Cui, Y., Han, X., Hu, W., Sun, M., Zhang, Y., Wang, P.-H., Song, G., Chen, W., and Lou,  
607 J. (2020) Liquid-liquid phase separation by SARS-CoV-2 nucleocapsid protein and RNA. *Cell Res*  
608 **30**, 1143-1145
- 609 25. Cubuk, J., Alston, J. J., Incicco, J. J., Singh, S., Stuchell-Brereton, M. D., Ward, M. D.,  
610 Zimmerman, M. I., Vithani, N., Griffith, D., Wagoner, J. A., Bowman, G. R., Hall, K. B., Soranno, A.,  
611 and Holehouse, A. S. (2021) The SARS-CoV-2 nucleocapsid protein is dynamic, disordered, and  
612 phase separates with RNA. *Nature communications* **12**, 1936-1936
- 613 26. Jack, A., Ferro, L. S., Trnka, M. J., Wehri, E., Nadgir, A., Nguyenla, X., Fox, D., Costa, K., Stanley,  
614 S., Schaletzky, J., and Yildiz, A. (2021) SARS-CoV-2 nucleocapsid protein forms condensates with  
615 viral genomic RNA. *PLOS Biology* **19**, e3001425
- 616 27. Lu, S., Ye, Q., Singh, D., Cao, Y., Diedrich, J. K., Yates, J. R., Villa, E., Cleveland, D. W., and  
617 Corbett, K. D. (2021) The SARS-CoV-2 nucleocapsid phosphoprotein forms mutually exclusive  
618 condensates with RNA and the membrane-associated M protein. *Nature Communications* **12**, 502
- 619 28. Perdikari, T. M., Murthy, A. C., Ryan, V. H., Watters, S., Naik, M. T., and Fawzi, N. L. (2020) SARS-  
620 CoV-2 nucleocapsid protein phase-separates with RNA and with human hnRNPs. *EMBO J* **39**,  
621 e106478-e106478
- 622 29. Carlson, C. R., Asfaha, J. B., Ghent, C. M., Howard, C. J., Hartooni, N., Safari, M., Frankel, A. D.,  
623 and Morgan, D. O. (2020) Phosphoregulation of Phase Separation by the SARS-CoV-2 Nucleocapsid  
624 Protein Suggests a Biophysical Basis for its Dual Functions. *Molecular Cell* **80**, 1092-1103.e1094
- 625 30. Wheeler, R. J., Lee, H. O., Poser, I., Pal, A., Doeleman, T., Kishigami, S., Kour, S., Anderson, E.  
626 N., Marrone, L., Murthy, A. C., Janel, M., Zhang, X., Boczek, E., Fritsch, A., Fawzi, N. L.,  
627 Sterneckert, J., Pandey, U., David, D. C., Davis, B. G., Baldwin, A. J., Hermann, A., Bickle, M.,  
628 Alberti, S., and Hyman, A. A. (2019) Small molecules for modulating protein driven liquid-liquid  
629 phase separation in treating neurodegenerative disease. *bioRxiv*, 721001
- 630 31. Fang, M. Y., Markmiller, S., Vu, A. Q., Javaherian, A., Dowdle, W. E., Jolivet, P., Bushway, P. J.,  
631 Castello, N. A., Baral, A., Chan, M. Y., Linsley, J. W., Linsley, D., Mercola, M., Finkbeiner, S.,  
632 Lecuyer, E., Lewcock, J. W., and Yeo, G. W. (2019) Small-Molecule Modulation of TDP-43  
633 Recruitment to Stress Granules Prevents Persistent TDP-43 Accumulation in ALS/FTD. *Neuron*  
634 **103**, 802-819.e811
- 635 32. Risso-Ballester, J., Galloux, M., Cao, J., Le Goffic, R., Hontonnou, F., Jobart-Malfait, A.,  
636 Desquesnes, A., Sake, S. M., Haid, S., Du, M., Zhang, X., Zhang, H., Wang, Z., Rincheval, V.,  
637 Zhang, Y., Pietschmann, T., Eléouët, J.-F., Rameix-Welti, M.-A., and Altmeyer, R. (2021) A  
638 condensate-hardening drug blocks RSV replication in vivo. *Nature* **595**, 596-599



- 639 33. Conti, B. A., and Oppikofer, M. (2022) Biomolecular condensates: new opportunities for drug  
640 discovery and RNA therapeutics. *Trends in Pharmacological Sciences* **43**, 820-837
- 641 34. Mitrea, D. M., Mittasch, M., Gomes, B. F., Klein, I. A., and Murcko, M. A. (2022) Modulating  
642 biomolecular condensates: a novel approach to drug discovery. *Nature Reviews Drug Discovery*  
643 35. Biesaga, M., Frigolé-Vivas, M., and Salvatella, X. (2021) Intrinsically disordered proteins and  
644 biomolecular condensates as drug targets. *Curr Opin Chem Biol* **62**, 90-100
- 645 36. Cai, T., Yu, Z., Wang, Z., Liang, C., and Richard, S. (2021) Arginine methylation of SARS-Cov-2  
646 nucleocapsid protein regulates RNA binding, its ability to suppress stress granule formation, and  
647 viral replication. *J Biol Chem* **297**, 100821
- 648 37. Doble, B. W., Patel, S., Wood, G. A., Kockeritz, L. K., and Woodgett, J. R. (2007) Functional  
649 redundancy of GSK-3alpha and GSK-3beta in Wnt/beta-catenin signaling shown by using an  
650 allelic series of embryonic stem cell lines. *Dev Cell* **12**, 957-971
- 651 38. Wu, C. H., Yeh, S. H., Tsay, Y. G., Shieh, Y. H., Kao, C. L., Chen, Y. S., Wang, S. H., Kuo, T. J.,  
652 Chen, D. S., and Chen, P. J. (2009) Glycogen synthase kinase-3 regulates the phosphorylation of  
653 severe acute respiratory syndrome coronavirus nucleocapsid protein and viral replication. *J Biol*  
654 *Chem* **284**, 5229-5239
- 655 39. Liu, X., Verma, A., Garcia, G., Ramage, H., Lucas, A., Myers, R. L., Michaelson, J. J., Coryell, W.,  
656 Kumar, A., Charney, A. W., Kazanietz, M. G., Rader, D. J., Ritchie, M. D., Berrettini, W. H., Schultz,  
657 D. C., Cherry, S., Damoiseaux, R., Arumugaswami, V., and Klein, P. S. (2021) Targeting the  
658 coronavirus nucleocapsid protein through GSK-3 inhibition. *Proceedings of the National Academy*  
659 *of Sciences* **118**, e2113401118
- 660 40. Rudd, C. E. (2020) GSK-3 Inhibition as a Therapeutic Approach Against SARs CoV2: Dual Benefit  
661 of Inhibiting Viral Replication While Potentiating the Immune Response. *Front Immunol* **11**, 1638
- 662 41. Pillaiyar, T., and Laufer, S. (2022) Kinases as Potential Therapeutic Targets for Anti-coronaviral  
663 Therapy. *Journal of Medicinal Chemistry* **65**, 955-982
- 664 42. Wu, D., and Pan, W. (2010) GSK3: a multifaceted kinase in Wnt signaling. *Trends Biochem Sci* **35**,  
665 161-168
- 666 43. Polakis, P. (1999) The oncogenic activation of  $\beta$ -catenin. *Current Opinion in Genetics &*  
667 *Development* **9**, 15-21
- 668 44. Martínez-González, L., Gonzalo-Consuegra, C., Gómez-Almería, M., Porrás, G., de Lago, E.,  
669 Martín-Requero, Á., and Martínez, A. (2021) Tideglusib, a Non-ATP Competitive Inhibitor of GSK-  
670  $3\beta$  as a Drug Candidate for the Treatment of Amyotrophic Lateral Sclerosis. *Int J Mol Sci* **22**
- 671 45. Murer, L., Volle, R., Andriasyan, V., Petkidis, A., Gomez-Gonzalez, A., Yang, L., Meili, N.,  
672 Suomalainen, M., Bauer, M., Policarpo Sequeira, D., Olszewski, D., Georgi, F., Kuttler, F., Turcatti,  
673 G., and Greber, U. F. (2022) Identification of broad anti-coronavirus chemical agents for  
674 repurposing against SARS-CoV-2 and variants of concern. *Curr Res Virol Sci* **3**, 100019
- 675 46. Yang, L., Pei, R.-j., Li, H., Ma, X.-n., Zhou, Y., Zhu, F.-h., He, P.-l., Tang, W., Zhang, Y.-c., Xiong,  
676 J., Xiao, S.-q., Tong, X.-k., Zhang, B., and Zuo, J.-p. (2021) Identification of SARS-CoV-2 entry  
677 inhibitors among already approved drugs. *Acta Pharmacologica Sinica* **42**, 1347-1353
- 678 47. Bouhaddou, M., Memon, D., Meyer, B., White, K. M., Rezelj, V. V., Correa Marrero, M., Polacco,  
679 B. J., Melnyk, J. E., Ulferts, S., Kaake, R. M., Batra, J., Richards, A. L., Stevenson, E., Gordon, D.  
680 E., Rojic, A., Obernier, K., Fabius, J. M., Soucheray, M., Miorin, L., Moreno, E., Koh, C., Tran, Q.  
681 D., Hardy, A., Robinot, R., Vallet, T., Nilsson-Payant, B. E., Hernandez-Armenta, C., Dunham, A.,  
682 Weigang, S., Knerr, J., Modak, M., Quintero, D., Zhou, Y., Dugourd, A., Valdeolivas, A., Patil, T.,  
683 Li, Q., Hüttenhain, R., Cakir, M., Muralidharan, M., Kim, M., Jang, G., Tutuncuoglu, B., Hiatt, J.,  
684 Guo, J. Z., Xu, J., Bouhaddou, S., Mathy, C. J. P., Gaulton, A., Manners, E. J., Félix, E., Shi, Y.,  
685 Goff, M., Lim, J. K., McBride, T., O'Neal, M. C., Cai, Y., Chang, J. C. J., Broadhurst, D. J.,  
686 Klippsten, S., De Wit, E., Leach, A. R., Kortemme, T., Shoichet, B., Ott, M., Saez-Rodriguez, J.,  
687 tenOever, B. R., Mullins, R. D., Fischer, E. R., Kochs, G., Grosse, R., García-Sastre, A., Vignuzzi,  
688 M., Johnson, J. R., Shokat, K. M., Swaney, D. L., Beltrao, P., and Krogan, N. J. (2020) The Global  
689 Phosphorylation Landscape of SARS-CoV-2 Infection. *Cell* **182**, 685-712.e619

- 690 48. Patten, J. J., Keiser, P. T., Gysi, D., Menichetti, G., Mori, H., Donahue, C. J., Gan, X., Do Valle, I.,  
691 Geoghegan-Barek, K., Anantpadma, M., Berrigan, J. L., Jalloh, S., Ayazika, T., Wagner, F., Zitnik,  
692 M., Ayehunie, S., Anderson, D., Loscalzo, J., Gummuluru, S., Namchuk, M. N., Barabasi, A. L.,  
693 and Davey, R. A. (2021) Multidose evaluation of 6,710 drug repurposing library identifies potent  
694 SARS-CoV-2 infection inhibitors &em&gt;In Vitro&/em&gt; and &em&gt;In Vivo&/em&gt;.  
695 *bioRxiv*, 2021.2004.2020.440626
- 696 49. Xiao, X., Wang, C., Chang, D., Wang, Y., Dong, X., Jiao, T., Zhao, Z., Ren, L., Dela Cruz, C. S.,  
697 Sharma, L., Lei, X., and Wang, J. (2020) Identification of Potent and Safe Antiviral Therapeutic  
698 Candidates Against SARS-CoV-2. *Frontiers in Immunology* **11**
- 699 50. Shen, Z., Halberg, A., Fong, J. Y., Guo, J., Song, G., Louie, B., Luedtke, G. R., Visuthikraisee, V.,  
700 Protter, A., Koh, X., Baik, T., and Lum, P. Y. (2022) Elucidating host cell response pathways and  
701 repurposing therapeutics for SARS-CoV-2 and other coronaviruses using gene expression profiles  
702 of chemical and genetic perturbations. *bioRxiv*, 2022.2004.2018.488682
- 703 51. Beurel, E., Grieco, S. F., and Jope, R. S. (2015) Glycogen synthase kinase-3 (GSK3): regulation,  
704 actions, and diseases. *Pharmacol Ther* **148**, 114-131
- 705 52. Kilgore, H. R., and Young, R. A. (2022) Learning the chemical grammar of biomolecular  
706 condensates. *Nat Chem Biol*
- 707 53. Nabeel-Shah, S., Lee, H., Ahmed, N., Burke, G. L., Farhangmehr, S., Ashraf, K., Pu, S.,  
708 Braunschweig, U., Zhong, G., Wei, H., Tang, H., Yang, J., Marcon, E., Blencowe, B. J., Zhang, Z.,  
709 and Greenblatt, J. F. (2022) SARS-CoV-2 nucleocapsid protein binds host mRNAs and attenuates  
710 stress granules to impair host stress response. *iScience* **25**, 103562
- 711 54. Zhao, M., Yu, Y., Sun, L.-M., Xing, J.-Q., Li, T., Zhu, Y., Wang, M., Yu, Y., Xue, W., Xia, T., Cai, H.,  
712 Han, Q.-Y., Yin, X., Li, W.-H., Li, A.-L., Cui, J., Yuan, Z., Zhang, R., Zhou, T., Zhang, X.-M., and Li,  
713 T. (2021) GCG inhibits SARS-CoV-2 replication by disrupting the liquid phase condensation of its  
714 nucleocapsid protein. *Nature Communications* **12**, 2114
- 715 55. Zhang, N., and Ashizawa, T. (2017) RNA toxicity and foci formation in microsatellite expansion  
716 diseases. *Current Opinion in Genetics & Development* **44**, 17-29
- 717 56. Shelkownikova, T. A., Robinson, H. K., Southcombe, J. A., Ninkina, N., and Buchman, V. L. (2014)  
718 Multistep process of FUS aggregation in the cell cytoplasm involves RNA-dependent and RNA-  
719 independent mechanisms. *Human Molecular Genetics* **23**, 5211-5226
- 720 57. Kino, Y., Washizu, C., Aquilanti, E., Okuno, M., Kurosawa, M., Yamada, M., Doi, H., and Nukina,  
721 N. (2011) Intracellular localization and splicing regulation of FUS/TLS are variably affected by  
722 amyotrophic lateral sclerosis-linked mutations. *Nucleic Acids Research* **39**, 2781-2798
- 723 58. Takanashi, K., and Yamaguchi, A. (2014) Aggregation of ALS-linked FUS mutant sequesters RNA  
724 binding proteins and impairs RNA granules formation. *Biochemical and Biophysical Research  
725 Communications* **452**, 600-607
- 726 59. Rodriguez, S., Sahin, A., Schrank, B. R., Al-Lawati, H., Costantino, I., Benz, E., Fard, D., Albers,  
727 A. D., Cao, L., Gomez, A. C., Evans, K., Ratti, E., Cudkowicz, M., Frosch, M. P., Talkowski, M.,  
728 Sorger, P. K., Hyman, B. T., and Albers, M. W. (2021) Genome-encoded cytoplasmic double-  
729 stranded RNAs, found in C9ORF72 ALS-FTD brain, propagate neuronal loss. *Science Translational  
730 Medicine* **13**, eaaz4699
- 731 60. Beausoleil, S. A., Villén, J., Gerber, S. A., Rush, J., and Gygi, S. P. (2006) A probability-based  
732 approach for high-throughput protein phosphorylation analysis and site localization. *Nature  
733 Biotechnology* **24**, 1285-1292
- 734 61. Sanjana, N. E., Shalem, O., and Zhang, F. (2014) Improved vectors and genome-wide libraries for  
735 CRISPR screening. *Nat Methods* **11**, 783-784
- 736 62. Doench, J. G., Fusi, N., Sullender, M., Hegde, M., Vaimberg, E. W., Donovan, K. F., Smith, I.,  
737 Tothova, Z., Wilen, C., Orchard, R., Virgin, H. W., Listgarten, J., and Root, D. E. (2016) Optimized  
738 sgRNA design to maximize activity and minimize off-target effects of CRISPR-Cas9. *Nat  
739 Biotechnol* **34**, 184-191

- 740 63. Xu, Q., Wang, Y., Dabdoub, A., Smallwood, P. M., Williams, J., Woods, C., Kelley, M. W., Jiang,  
741 L., Tasman, W., Zhang, K., and Nathans, J. (2004) Vascular development in the retina and inner  
742 ear: control by Norrin and Frizzled-4, a high-affinity ligand-receptor pair. *Cell* **116**, 883-895  
743

744  
745  
746  
747  
748  
749  
750  
751  
752  
753  
754  
755  
756  
757  
758  
759

**FIGURE 1 – HCoV N proteins phase separate in a polyIC-inducible manner.**

- (A) Fluorescence images of A549 cells stably expressing the N protein from seven HCoVs. For all seven cell lines, N condensates can be induced with 1µg/mL transfected polyIC for 7h. Images taken at 40x air magnification, confocal. Scale bar, 10 µm. SARS1, SARS-CoV; SARS2, SARS-CoV-2; OC43, HCoV-OC43; 229E, HCoV-229E; NL63, HCoV-NL63; HKU1, HCoV-HKU1; MERS, MERS-CoV.
- (B) Quantification of number of N condensates per cell for each of the seven cell lines. Data indicates mean ± standard deviation of duplicate experiments.
- (C) Time-lapse imaging showing polyIC-induced SARS-CoV-2 and constitutive HCoV-229E N condensate fusion events over time. Dotted circles highlight a representative fusion event. Images taken at 40x air magnification, confocal. Scale bar, 10 µm.
- (D) FRAP analyses of SARS-CoV-2 polyIC-induced and HCoV-229E constitutive N condensates. Images are single N condensates representative of each condition. Mean fluorescence intensity plot illustrates FRAP results for n = 7 condensates per condition. Images taken at 60x oil magnification, widefield. Scale bar, 1 µm.
- (E) Final fluorescence recovery percentage 2 min post-bleach. Data indicates mean ± standard deviation of all seven condensates.

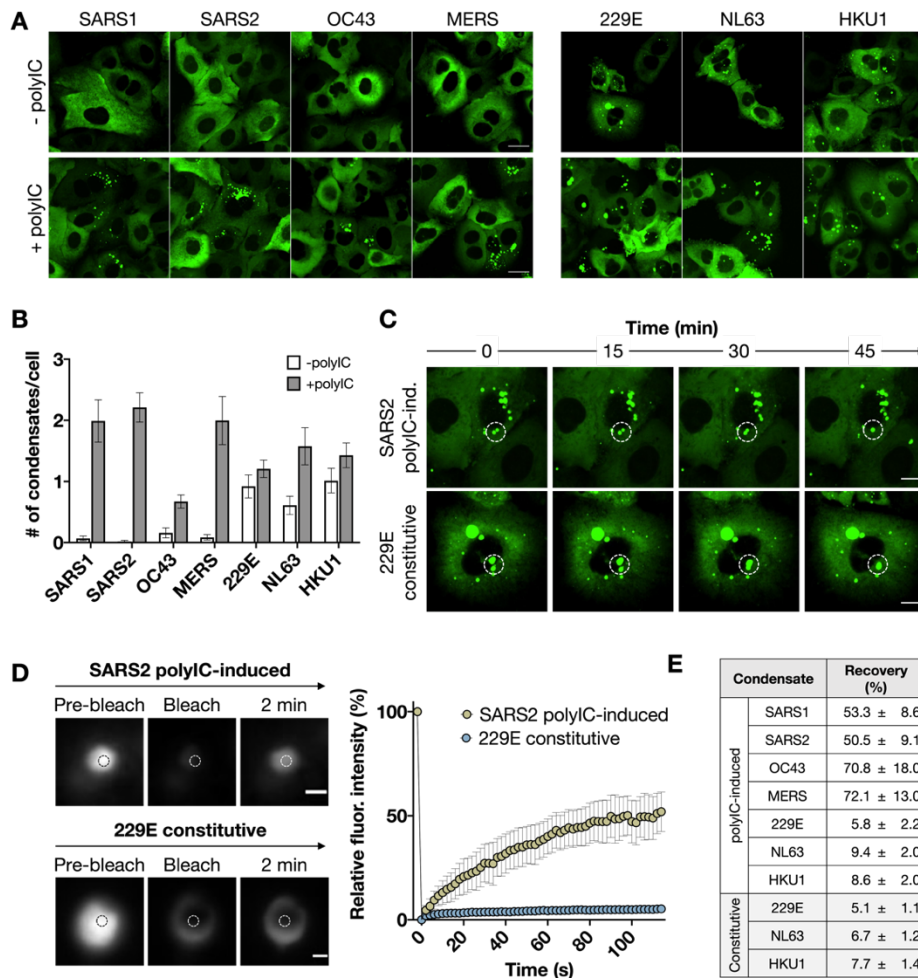

760

761 **FIGURE 2 – High content phenotypic screening assay to identify modulators of SARS-CoV-2 N**  
 762 **condensation.**

- 763 (A) Schematic illustrating the sliding scale of N condensate material properties, adapted from Boeynaems  
 764 et al., 2018 (1). N can exist in a soluble, diffuse cytoplasmic state, or anywhere along a continuum  
 765 ranging from liquid-like condensates to more solid gel-like states. These various states are associated  
 766 with different stages in viral replication such as transcription/replication and virion packaging.  
 767 Intermolecular interaction strength tunes the material properties of condensates. Molecularly, N (as  
 768 well as other components of N condensates) are more closely packed as interaction strength  
 769 increases, leading to the formation and progression of liquid-like condensates to more gel-like  
 770 aggregates. On a cellular level, liquid-like condensates appear as small spherical puncta, while  
 771 progression to more gel-like states may result in the formation of larger, more irregularly-shaped  
 772 aggregates. Small molecules that perturb the material state of N are referred to in this study as ‘pro-  
 773 condensers’ and ‘condensate inhibitors’.
- 774 (B) Schematic illustrating the pipeline for the pro-condensation screen to identify N pro-condensation  
 775 compounds. Cells are seeded, then treated with compounds for 24h before fixing and staining.  
 776 Representative images show the negative (DMSO) and positive (10 $\mu$ M MS023) controls. Quantification  
 777 of number of N puncta per cell for controls is illustrated in the chart. Data indicates individual replicates.  
 778 Images taken at 20x air magnification, widefield. Z' for the screening assay is calculated as indicated  
 779 in Methods.
- 780 (C) Schematic illustrating the pipeline for the N condensate inhibition screen to identify N condensate-  
 781 inhibiting compounds. Cells are seeded, treated with compounds for 17h, then treated with 1 $\mu$ g/mL  
 782 transfected polyIC for an additional 7h before fixing and staining. Representative images show the  
 783 negative (DMSO) and positive (10 $\mu$ M salvianolic acid B) controls. Quantification of number of N puncta  
 784 per cell for controls is illustrated in the chart. Images taken at 20x air magnification, widefield. Z' for  
 785 the screening assay is calculated as indicated in Methods.

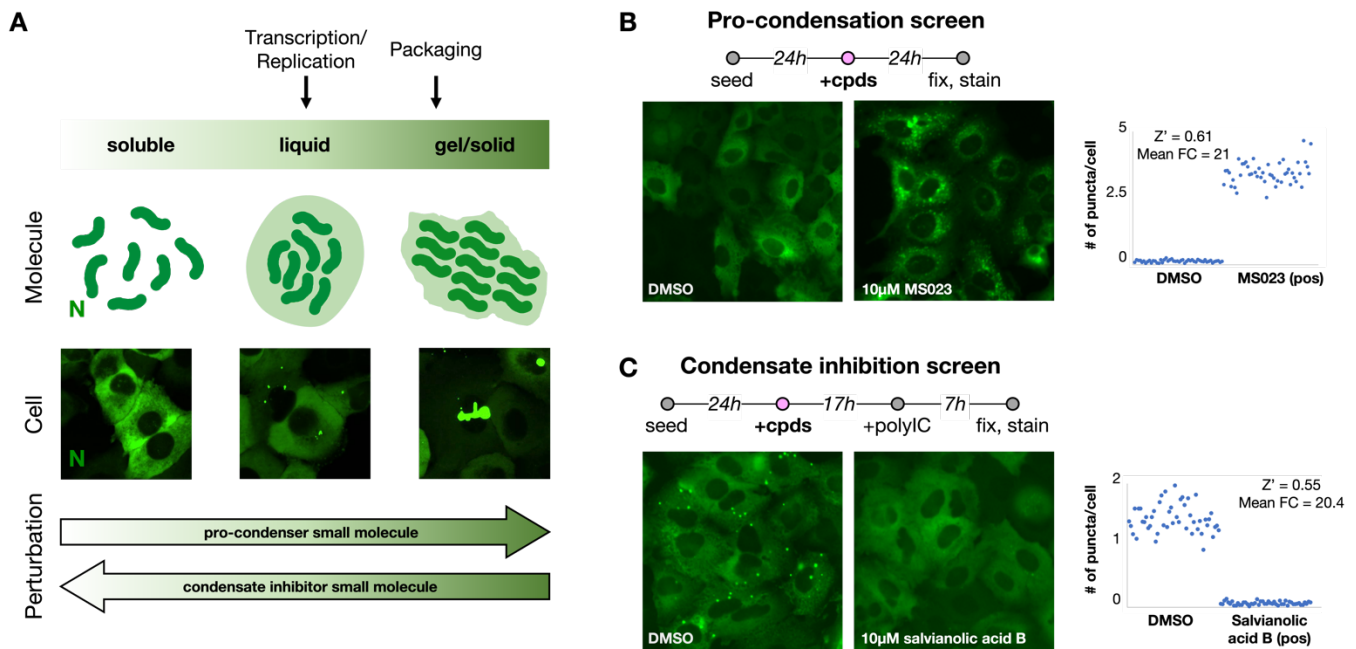

786



787 **FIGURE 3 – GSK3 and proteasome inhibitors promote pan-HCoV N condensation and condensate**  
 788 **hardening.**

- 789 (A) Scatter plot illustrating SARS-CoV-2 N pro-condensation screening results. Data is represented as  
 790 percentage N condensation activity. Data graphed shows both technical replicates. Blue points:  
 791 identified compounds that showed N condensation activity greater than two standard deviations from  
 792 the mean based on DMSO control percentage activity (see Methods for definition). Validated hit  
 793 compounds are annotated on the plot.  
 794 (B) Hit compounds classified according to their annotated cellular targets. Images are taken at 40x air  
 795 magnification, widefield. Dose response curves indicate fold change in number of N puncta per cell  
 796 over DMSO control (fold DMSO) and illustrate mean  $\pm$  standard deviation of duplicates. Scale bar, 10  
 797  $\mu$ m.  
 798 (C) Fluorescence images and quantification for A549 SARS-CoV-2 N-EGFP cell lines treated with  
 799 400ng/ $\mu$ L Wnt3a for 24h. Graph illustrates mean  $\pm$  standard deviation of duplicates. Images are taken  
 800 at 20x air magnification, widefield. Scale bar, 20  $\mu$ m.  
 801 (D) Fluorescence images and western blot quantification for GSK3 $\alpha$ , GSK3 $\beta$  and GSK3 $\alpha/\beta$  CRISPR  
 802 knockout cell lines illustrating increase in N condensation. Images are taken at 20x air magnification,  
 803 widefield. Scale bar, 20  $\mu$ m. Non-targeting: non-targeting sgRNA control.  
 804 (E) Fluorescence images of all seven HCoV N-EGFP cell lines treated with 10 $\mu$ M GSK3 inhibitor hit  
 805 compounds for 24h. Images are taken at 40x air magnification, widefield. Scale bar, 10  $\mu$ m.  
 806 (F) Left: N condensation EC50s for all seven HCoV N-EGFP cell lines across all seven ATP-competitive  
 807 and two non-ATP-competitive GSK3 inhibitors. Right: EC50s for SARS-CoV-2/HCoV-NL63 N  
 808 condensation and Wnt signaling as represented by  $\beta$ -catenin activation.  $\beta$ -catenin activation was  
 809 measured using a MEF  $\beta$ -catenin-activated luciferase reporter cell line. EC50s shown are  
 810 representative of at least two biological duplicate experiments. Auto., autophinib; Laduv., laduviglisib.

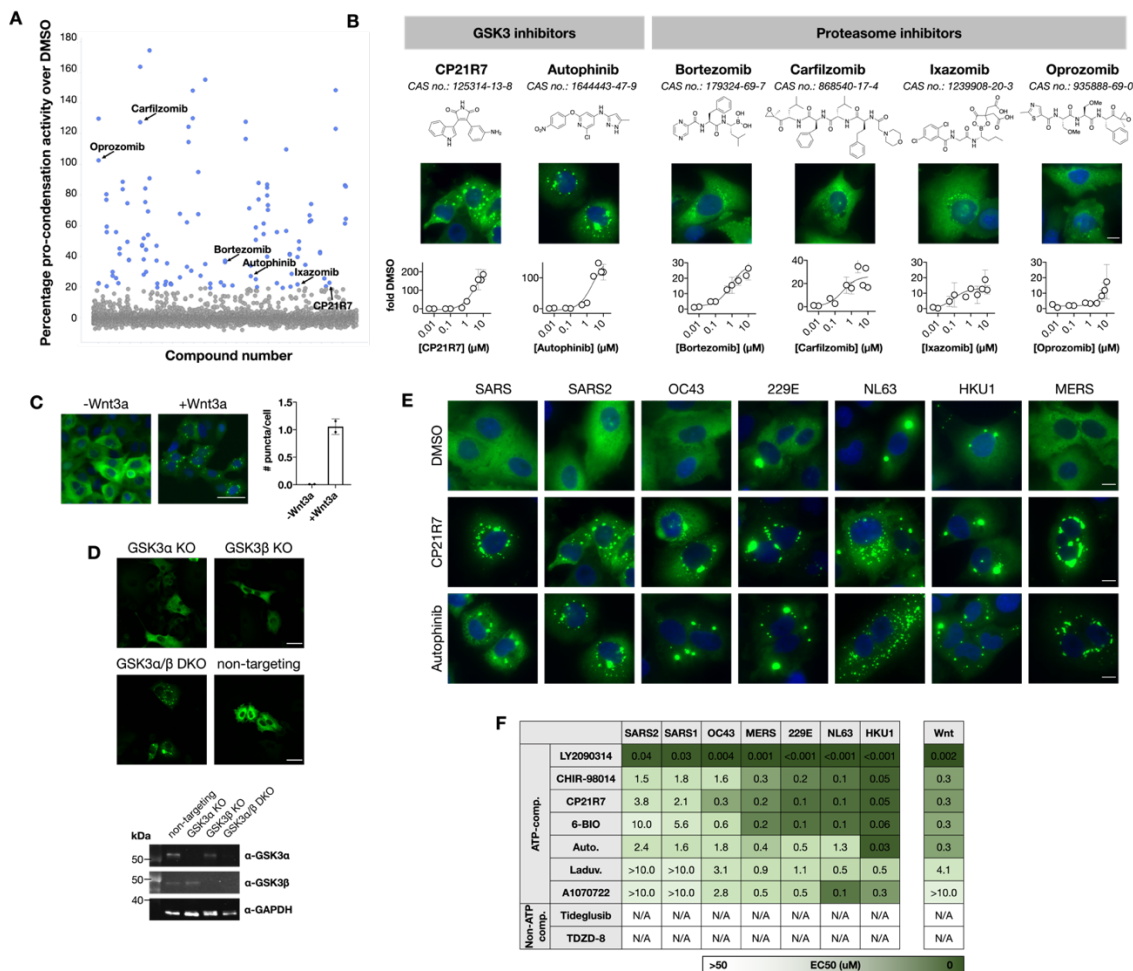



- 812 **FIGURE 4 – Diverse classes of compounds inhibit SARS-CoV-2 polyIC-induced N condensation**  
 813 (A) Scatter plot illustrating SARS-CoV-2 N condensate inhibition screening results. Data is represented  
 814 as percentage N condensate inhibition activity. Data graphed shows both technical replicates. Yellow  
 815 points: identified compounds that showed N condensation inhibition activity greater than two  
 816 standard deviations from the mean based on DMSO control percentage activity (see Methods for  
 817 definition). Validated hit compounds are annotated on the plot.  
 818 (B) Hit compounds classified according to their annotated cellular targets. Images are taken at 40x air  
 819 magnification, widefield. Dose response curves indicate fold change of number of N puncta per cell  
 820 over DMSO control (fold DMSO) and illustrate mean  $\pm$  standard deviation of duplicates. Scale bar, 10  
 821  $\mu$ m.  
 822 (C) Dose response curves illustrating inhibition of stress granule formation and IRF3 activation by various  
 823 N condensate inhibitors. Data shown indicates the fold change in average nuclear to cytoplasmic  
 824 signal of IRF3 compared to DMSO (left y-axis) and the fold change in number of G3BP1-containing  
 825 stress granules per cell compared to DMSO (right y-axis). All data indicate mean  $\pm$  standard deviation  
 826 of duplicates.  
 827 (D) Representative fluorescence images of SARS-CoV/SARS-CoV-2/HCoV-OC43/MERS-CoV N-EGFP  
 828 cell lines treated with 10 $\mu$ M condensate inhibitors 17h followed by 1 $\mu$ g/mL transfected polyIC  
 829 treatment for an additional 7h. Images are taken at 40x air magnification, widefield. Scale bar, 10  $\mu$ m.  
 830 (E) N condensate inhibition IC50s for SARS-CoV/SARS-CoV-2/HCoV-OC43/MERS-CoV N-EGFP cell  
 831 lines across all four active condensate inhibitors. IC50s shown are representative of at least two  
 832 biological duplicate experiments.

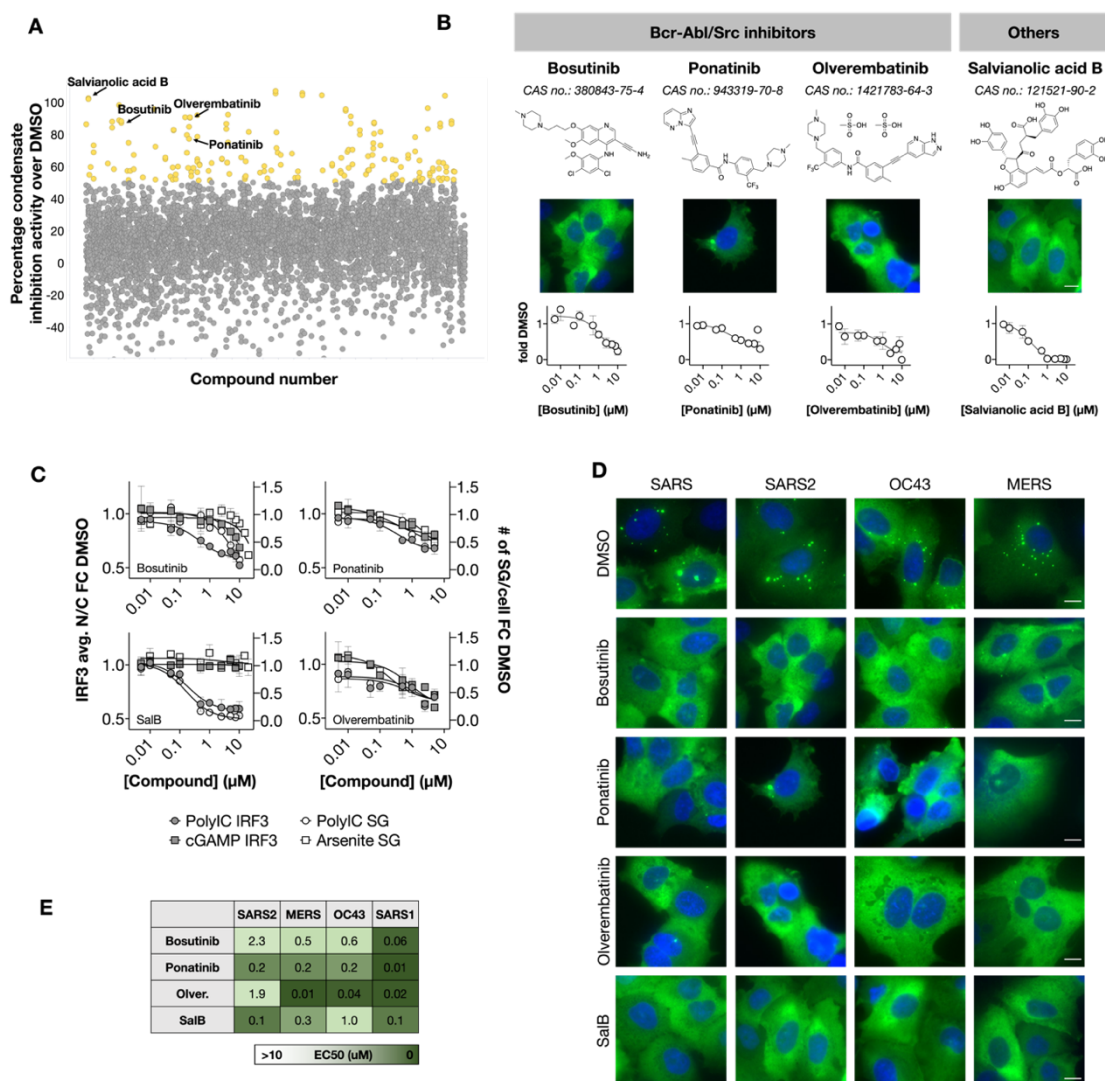

- 834 **FIGURE 5 – N condensate modulators are antiviral against SARS-CoV-2, HCoV-OC43 and HCoV-**  
 835 **229E**  
 836 (A) Active compounds from our screens and follow-up assays that have been identified as antiviral across  
 837 various HCoV infection models by prior studies.  
 838 (B) Antiviral IC50s (from prior studies, where available) and corresponding N condensation EC50s (from  
 839 our N condensation assays) for GSK3 inhibitors illustrating a correlation between N condensation  
 840 potency and antiviral activity.  
 841 (C) Schematic illustrating the tunability of N condensation by small molecules identified in our screens.  
 842 GSK3 phosphorylates all seven HCoV N proteins. ATP-competitive GSK3 inhibitors and Wnt signaling  
 843 inhibit N phosphorylation and promote N condensation, with resultant condensates exhibiting  
 844 significantly reduced dynamics. Inhibition of one or more host factors involved in SG/IRF3 signaling  
 845 pathways by the Bcr-Abl/Src kinase family of inhibitors prevent polyIC/RNA-induced N condensation.  
 846 In addition, SalB may inhibit polyIC/RNA-induced N condensation through different mechanisms such  
 847 as the inhibition of host factor(s) that induce N condensation through SG/IRF3-independent  
 848 mechanisms, and/or direct interference of N-RNA/polyIC interactions.

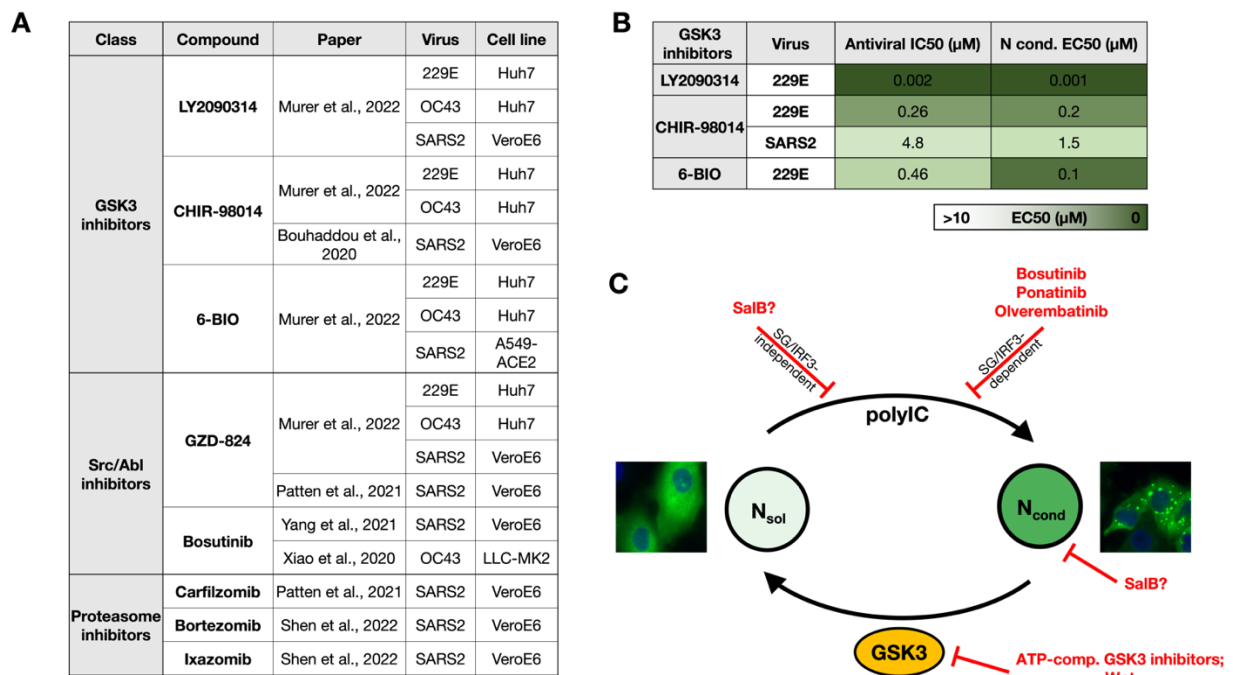

849
